# Supplementary material for: Knowledge and Perceptions Regarding Coronavirus (COVID-19) among Pediatric Dentists during Lockdown Period
Source: MDPI journal article supplement (doi:10.3390/ijerph19010209), 2021-12-25
Supplement: s1 [file s1]

### Questionnaire- Form

#### Socio-demographic details:

1. Gender: Male/Female
2. Age(years): 19-25; 26-30; 31-35; 36-40; 41-45; 46-50; >50
3. Occupation: Faculty / Private Practitioners/ Postgraduate students
4. Source of Information:  
Source of Information: 1. social media- whatsapp, youtube, telegram, Facebook, Twitter, and Snapchat., etc; 2. Health authorities- WHO, CDC, ADA, university authorities, Local and international societies; and Both
5. Do you have sufficient knowledge about COVID-19?- Yes/ No/ Maybe

#### Knowledge:

| Questions                                                                                                                      | Response |
|--------------------------------------------------------------------------------------------------------------------------------|----------|
| 1. Do you know that COVID-19 is a viral infection?                                                                             | Yes/No   |
| 2. Do you know that COVID-19 is fatal?                                                                                         | Yes/No   |
| 3. Do you know that COVID-19 is transmitted by close contact with an infected person?                                          | Yes/No   |
| 4. Do you know that fever, cough, and shortness of breath are symptoms of COVID-19?                                            | Yes/No   |
| 5. Do you know that the incubation period is COVID-19 is 2 weeks?                                                              | Yes/No   |
| 6. Do you think the vaccine is available in markets?                                                                           | Yes/No   |
| 7. Do you think washing hands with soap and water or the use of sanitizer can help in the prevention of COVID-19 transmission? | Yes/No   |
| 8. Do you know dentists are at a higher risk of COVID-19?                                                                      | Yes/No   |
| 9. Do you think patients with underlying chronic diseases are at a higher risk of COVID-19?                                    | Yes/No   |
| 10. Do you know that the use of N-95 can help in avoiding COVID-19?                                                            | Yes/No   |

#### Perceptions:

| Questions                                                                                                                                  | Response |
|--------------------------------------------------------------------------------------------------------------------------------------------|----------|
| 1. Are you worried one of your family members may get COVID-19?                                                                            | Yes/No   |
| 2. Transmission of COVID-19 can be prevented by using standard and isolation precautions given by WHO, CDC, ADA, etc?                      | Yes/No   |
| 3. The prevalence of COVID-19 can be reduced by the active participation of health care workers in the hospital infection control program? | Yes/No   |
| 4. If a COVID-19 vaccine is available, would you have it?                                                                                  | Yes/No   |
| 5. Do you think dental treatment should be provided to patients with COVID-19 positive?                                                    | Yes/No   |
| 6. Dentists must avail themselves of all information about the COVID-19?                                                                   | Yes/No   |
| 7. Is the available information about COVID-19 in your professional society sufficient?                                                    | Yes/No   |
| 8. Are the government institutions able to control the pandemic?                                                                           | Yes/No   |
